# Supplementary material
Source: Royal Society of Chemistry journal article supplement (doi:10.1039/d6nr00764c)

## Supplementary Information

# Ultra-Sensitive Mercury Sensor Based on Thin Film Transistor using Flavin Self-Assembly on Monochiral Carbon Nanotubes

*Dong Hwan Kim,<sup>a</sup> Seongjoo Hwang,<sup>b</sup> Yoonbeen Kang,<sup>b</sup> and Sang-Yong Ju<sup>a,b,\*</sup>*

<sup>a</sup>Graduate School of Convergence Semiconductor Collaboration Process, Yonsei University, Seoul 03722, Republic of Korea; <sup>b</sup>Department of Chemistry, Yonsei University, Seoul 03722, Republic of Korea

\*To whom correspondence should be addressed; E-mail: [syju@yonsei.ac.kr](mailto:syju@yonsei.ac.kr)

### Note S1: Conductance calculation of FC12/(8,6)-SWCNT TFT devices

The electrical conductance ( $G$ ) of the FC12/(8,6)-SWCNT TFT devices was extracted from the low-bias linear regime of the  $I_D$ - $V_D$  characteristics. To minimize the influence of contact nonlinearity and high-field effects, the conductance was determined from the slope of the  $I_D$ - $V_D$  curve within the range of  $V_D = -0.2$  to  $0.2$  V at  $V_G = 0$  V. The conductance is defined as:

$$G = dI_D/dV_D \quad (\text{S1})$$

where  $I_D$  is the drain current and  $V_D$  is the drain voltage. The slope was obtained by linear fitting of the  $I_D$ - $V_D$  curve within the specified low-voltage window. For the PEGulated device, the measured current change in the linear regime yielded:

$$G_{\text{PEG}} = 8.3 \times 10^{-10} \text{ S}$$

In contrast, the untreated device exhibited:

$$G_{\text{untreated}} = 1.0 \times 10^{-12} \text{ S}$$

These results indicate an approximately two-order-of-magnitude enhancement in conductance upon PEG treatment. Because the conductance was extracted in the low-bias regime, the calculated  $G$  primarily reflects channel-dominated transport behavior.

**Fig. S1** Photographs of probe station and TFT device.

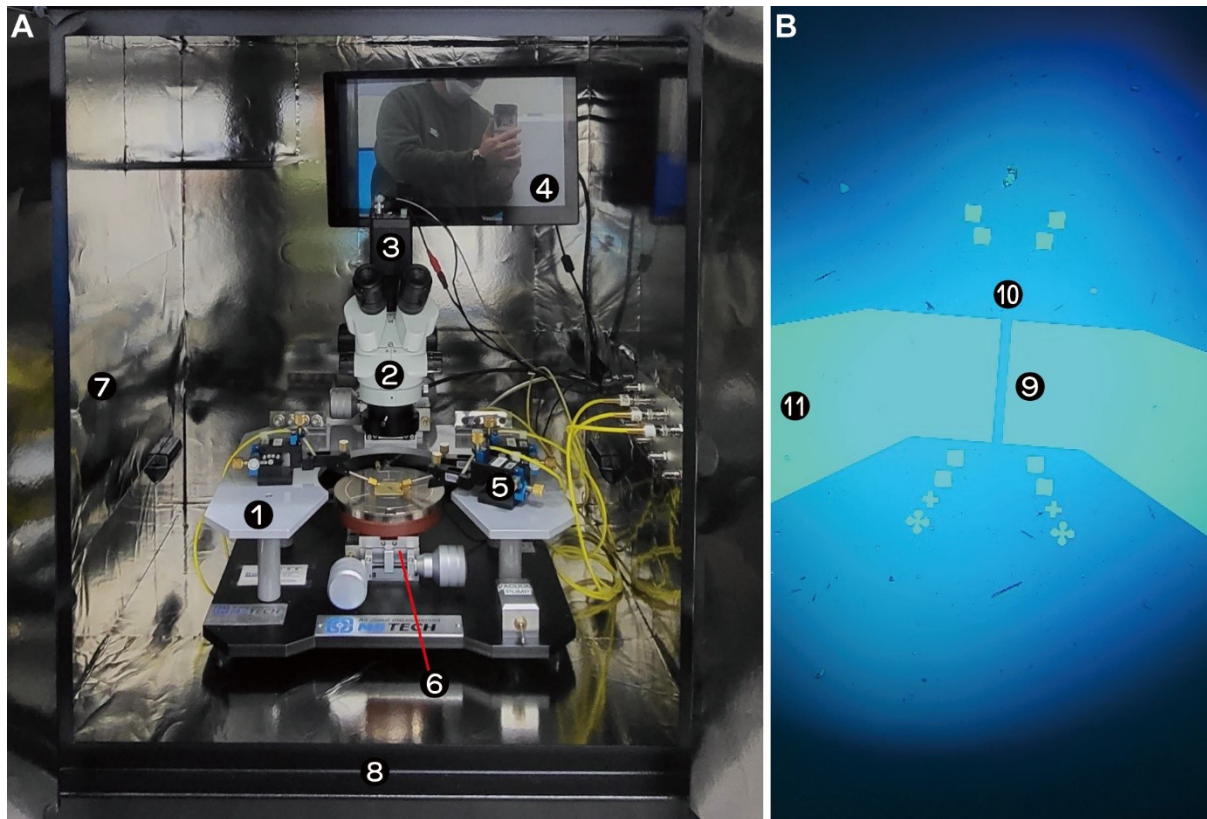

**A) Entire probe station**

1. Probe station
2. Microscope
3. Camera
4. Monitor
5. Probe
6. Vacuum stage
7. Mu-metal
8. Dark shield box

**B) Device**

9. 230 μm channel width
10. 20 μm channel length
11. 50 nm thick Au/Ti electrode on a 285 nm-thick SiO<sub>2</sub>/Si substrate

**Fig. S2** PLE contour map of FC12/(8,6)-SWCNT film assembled on TFT device after photolithography including lift-off process.

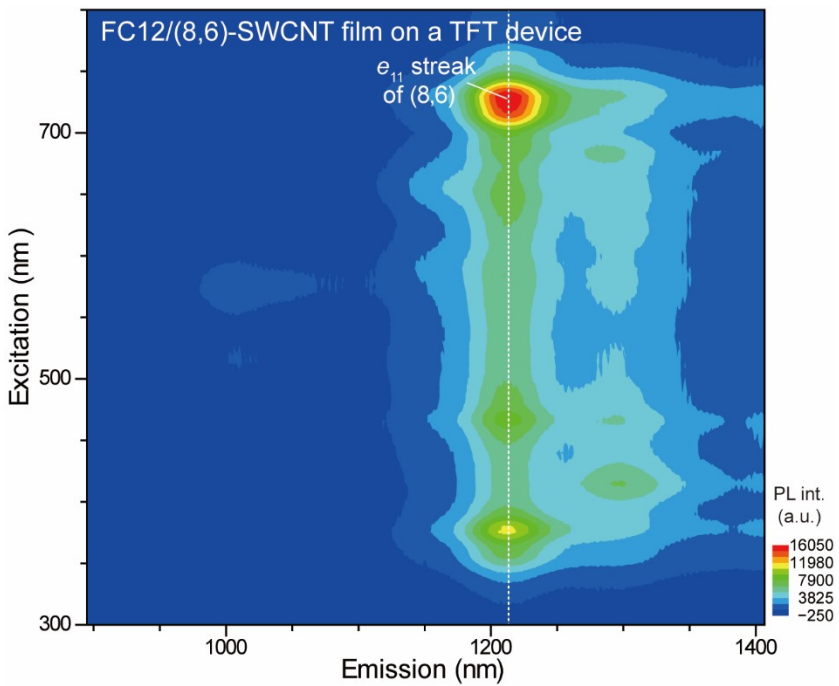

**Fig. S3** (A–K) AFM height topographies of SAM with varying ratio of chloro(dimethyl)ethylsilane, chloro(dimethyl)octylsilane. Scale bars: 1  $\mu\text{m}$  throughout figures.

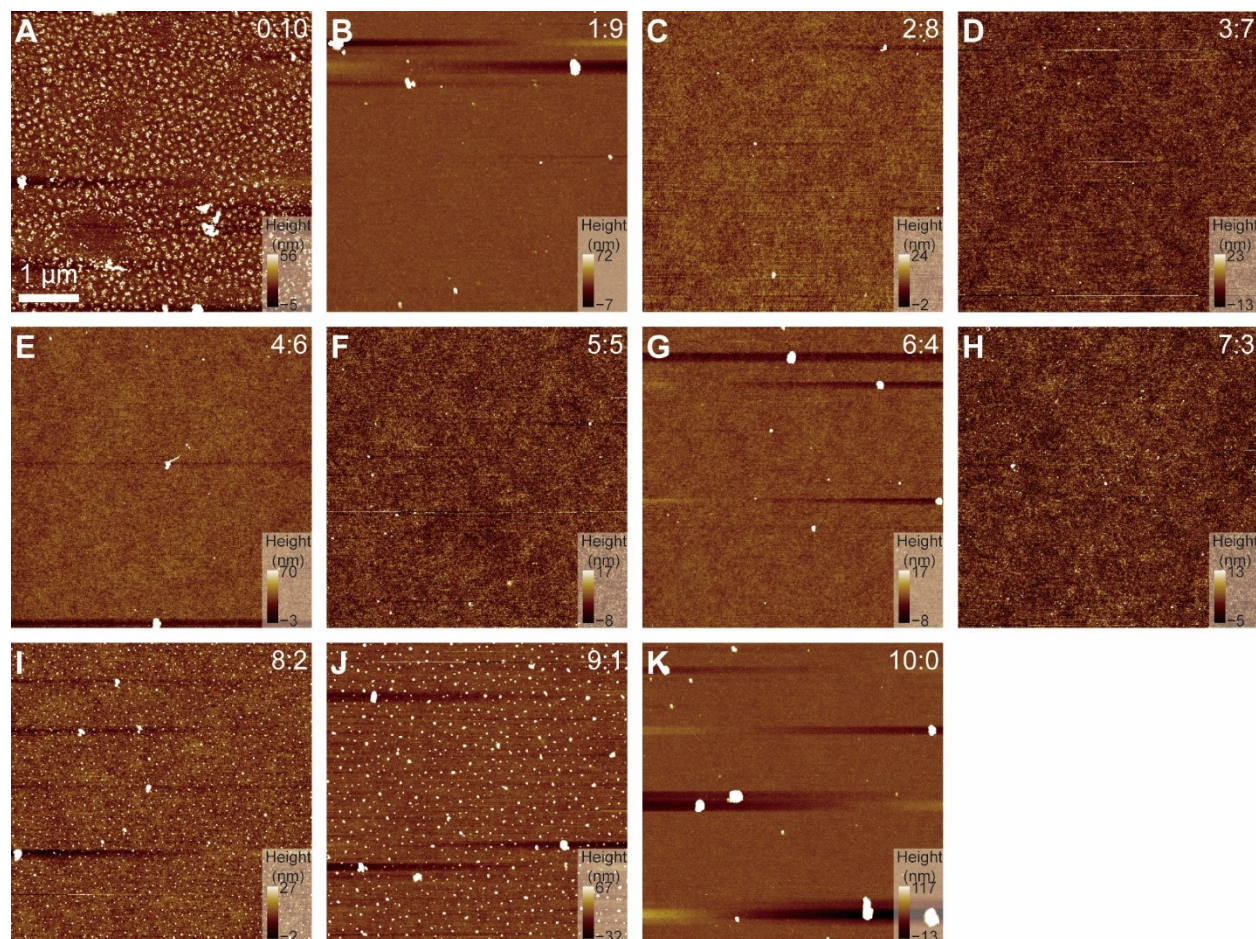

**Fig. S4** Water contact angle change on the tandem alkyl SAM with varying precursor ratio of chloro(dimethyl)ethylsilane/choloro(dimethyl)octylsilane.

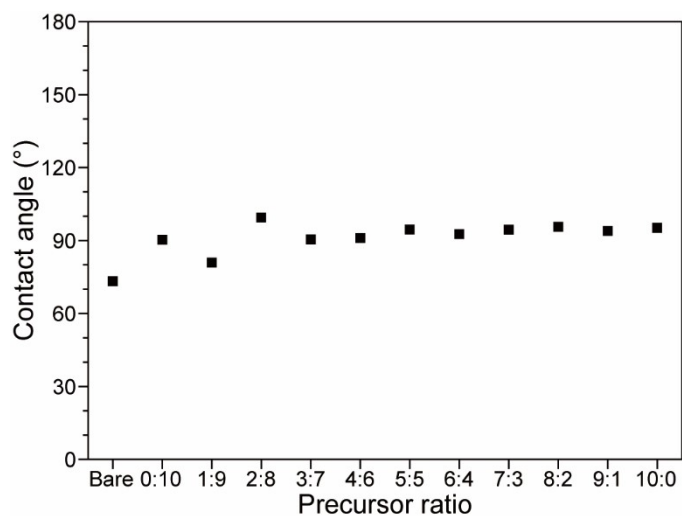

**Fig. S5** Transfer characteristics ( $I_D$ - $V_G$ ) of FC12/(8,6)-SWCNT TFT devices measured at  $V_D = 1$  V (A) before and (B) after PEGylation of Au electrodes.

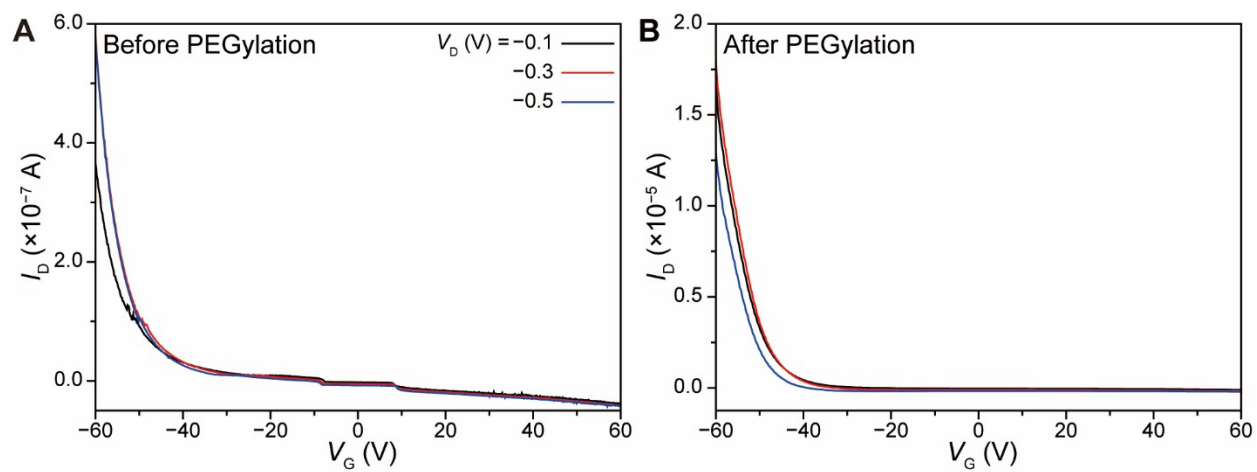

**Fig. S6** Net effect of  $I_D$  levels of the Hg-sensing characteristics of FC12/(8,6)-SWCNT device with PEGylation.

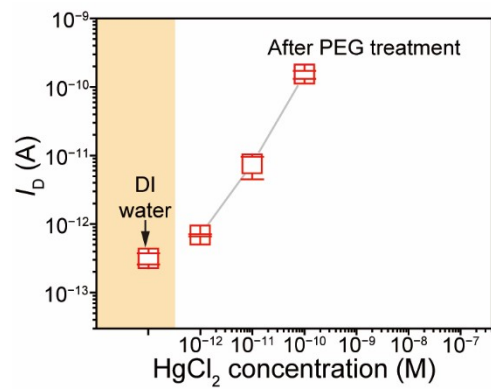

Supplement: d6nr00764c1.pdf [file d6nr00764c1.pdf]
